# Supplementary figures and images for: A perfusion-independent role of blood vessels in determining branching stereotypy of lung airways
Source: Oxford University Press journal article supplement (doi:10.1242/dev.060723), 2011-05-10

A

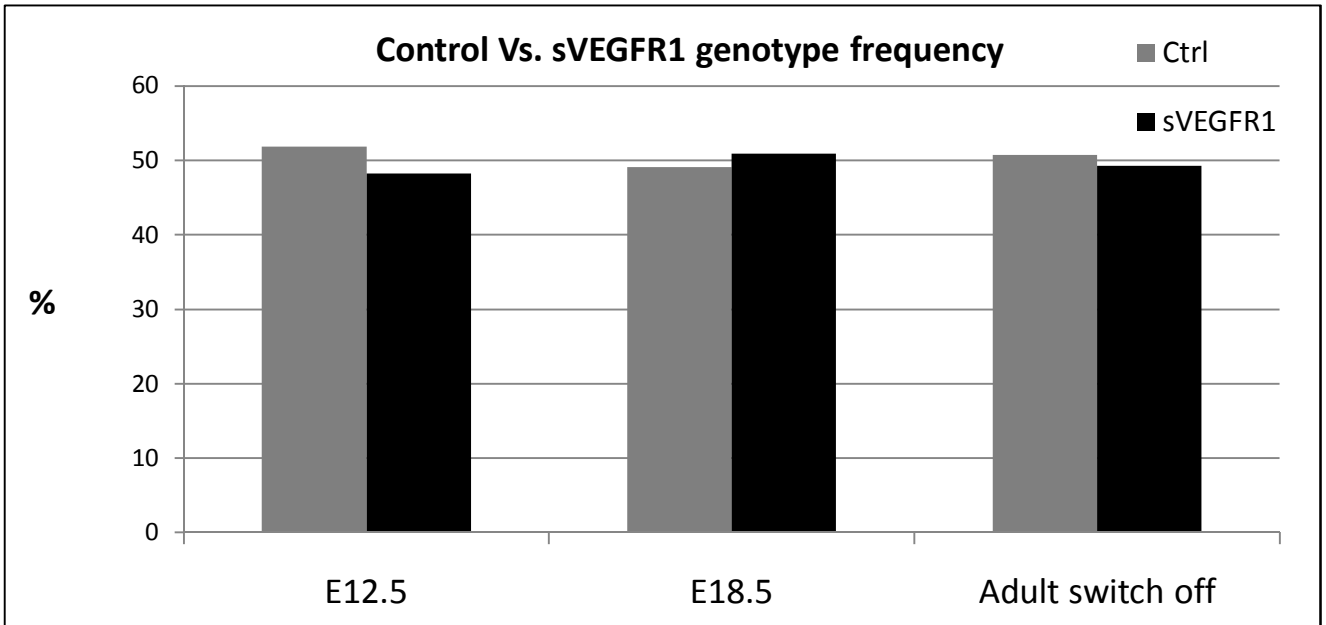

B

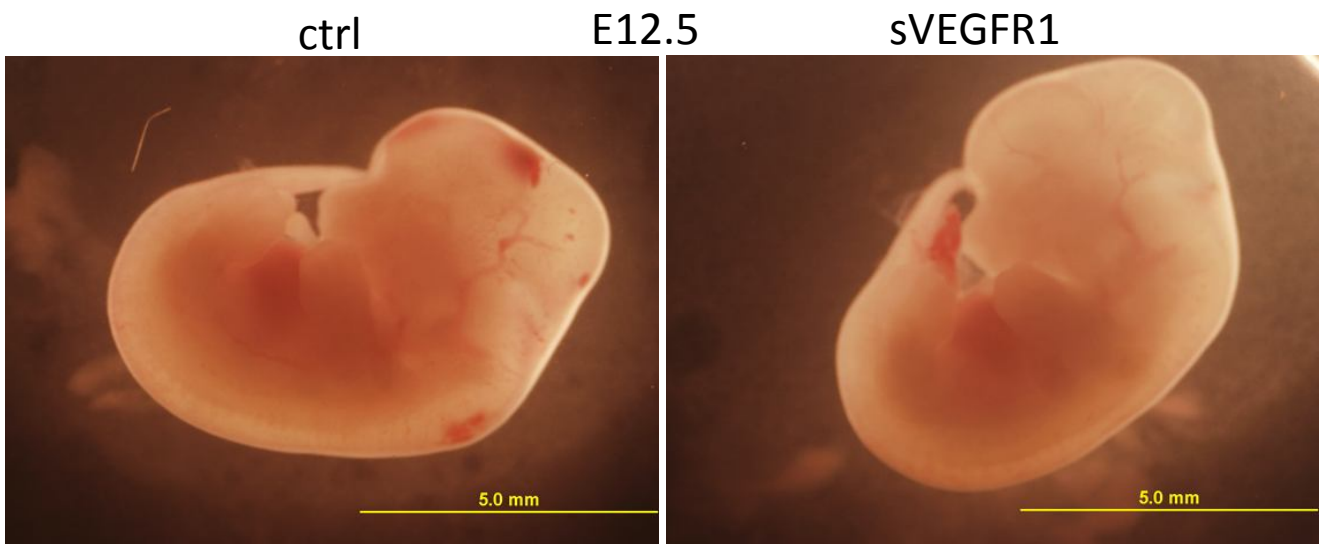

C

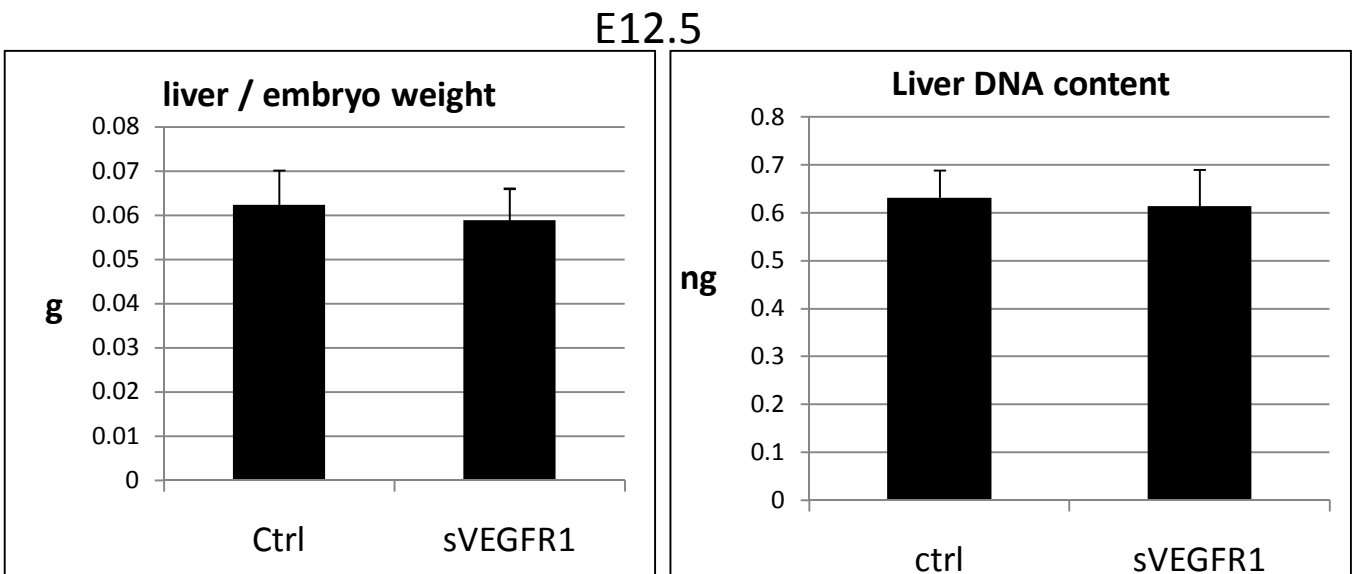

Supplement: dev060723figs1.pdf [file dev060723figs1.pdf]

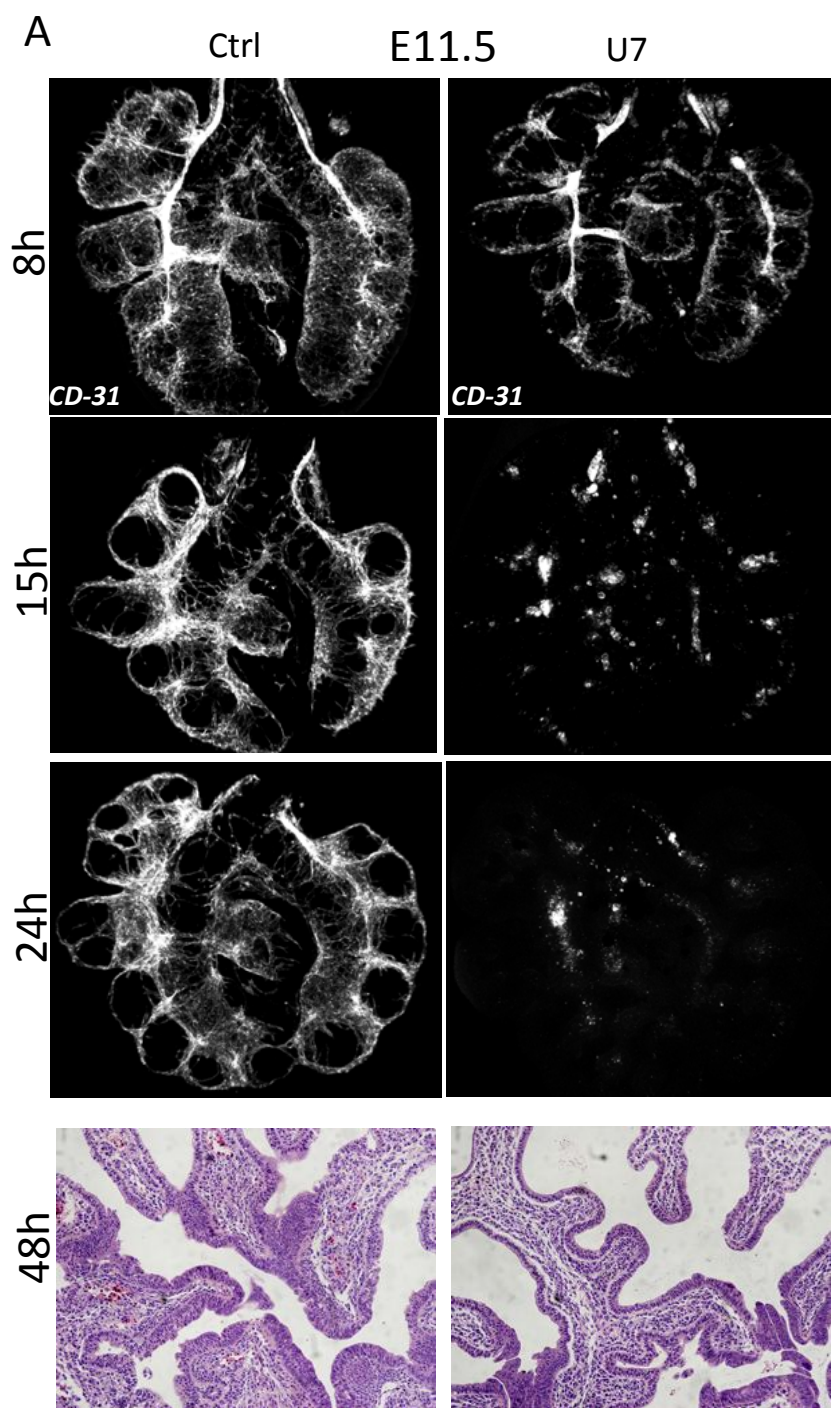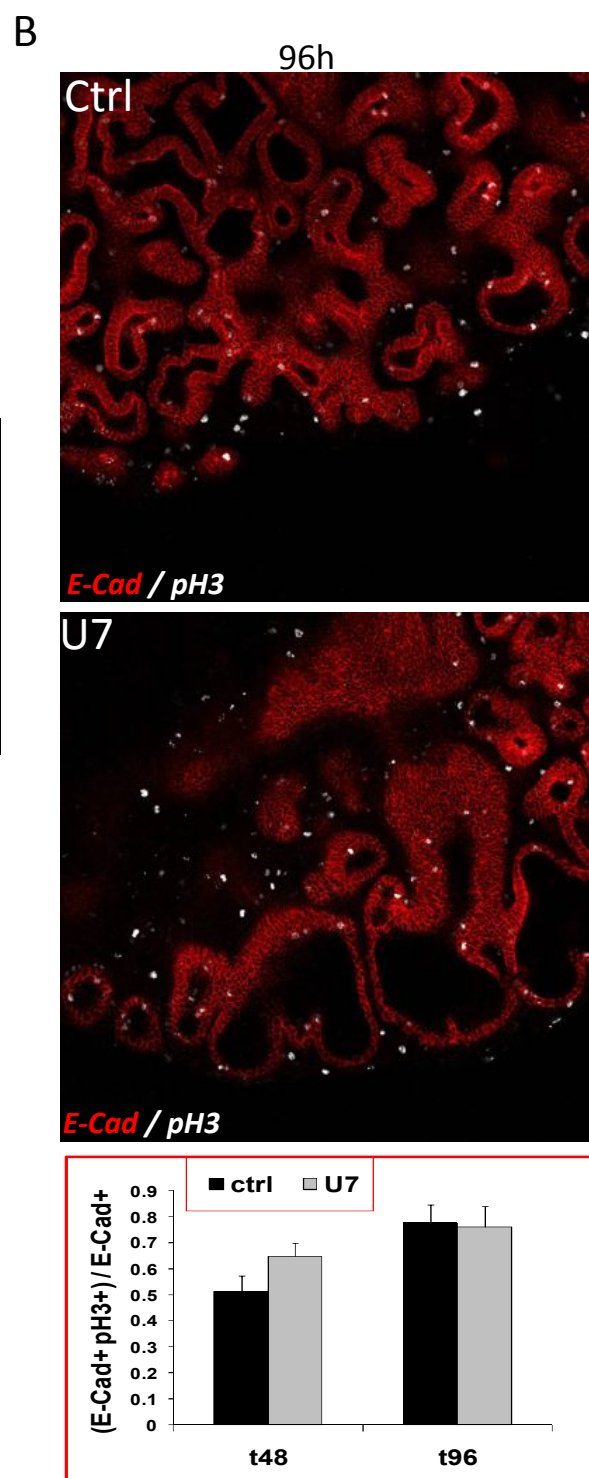

Fig S10C,D

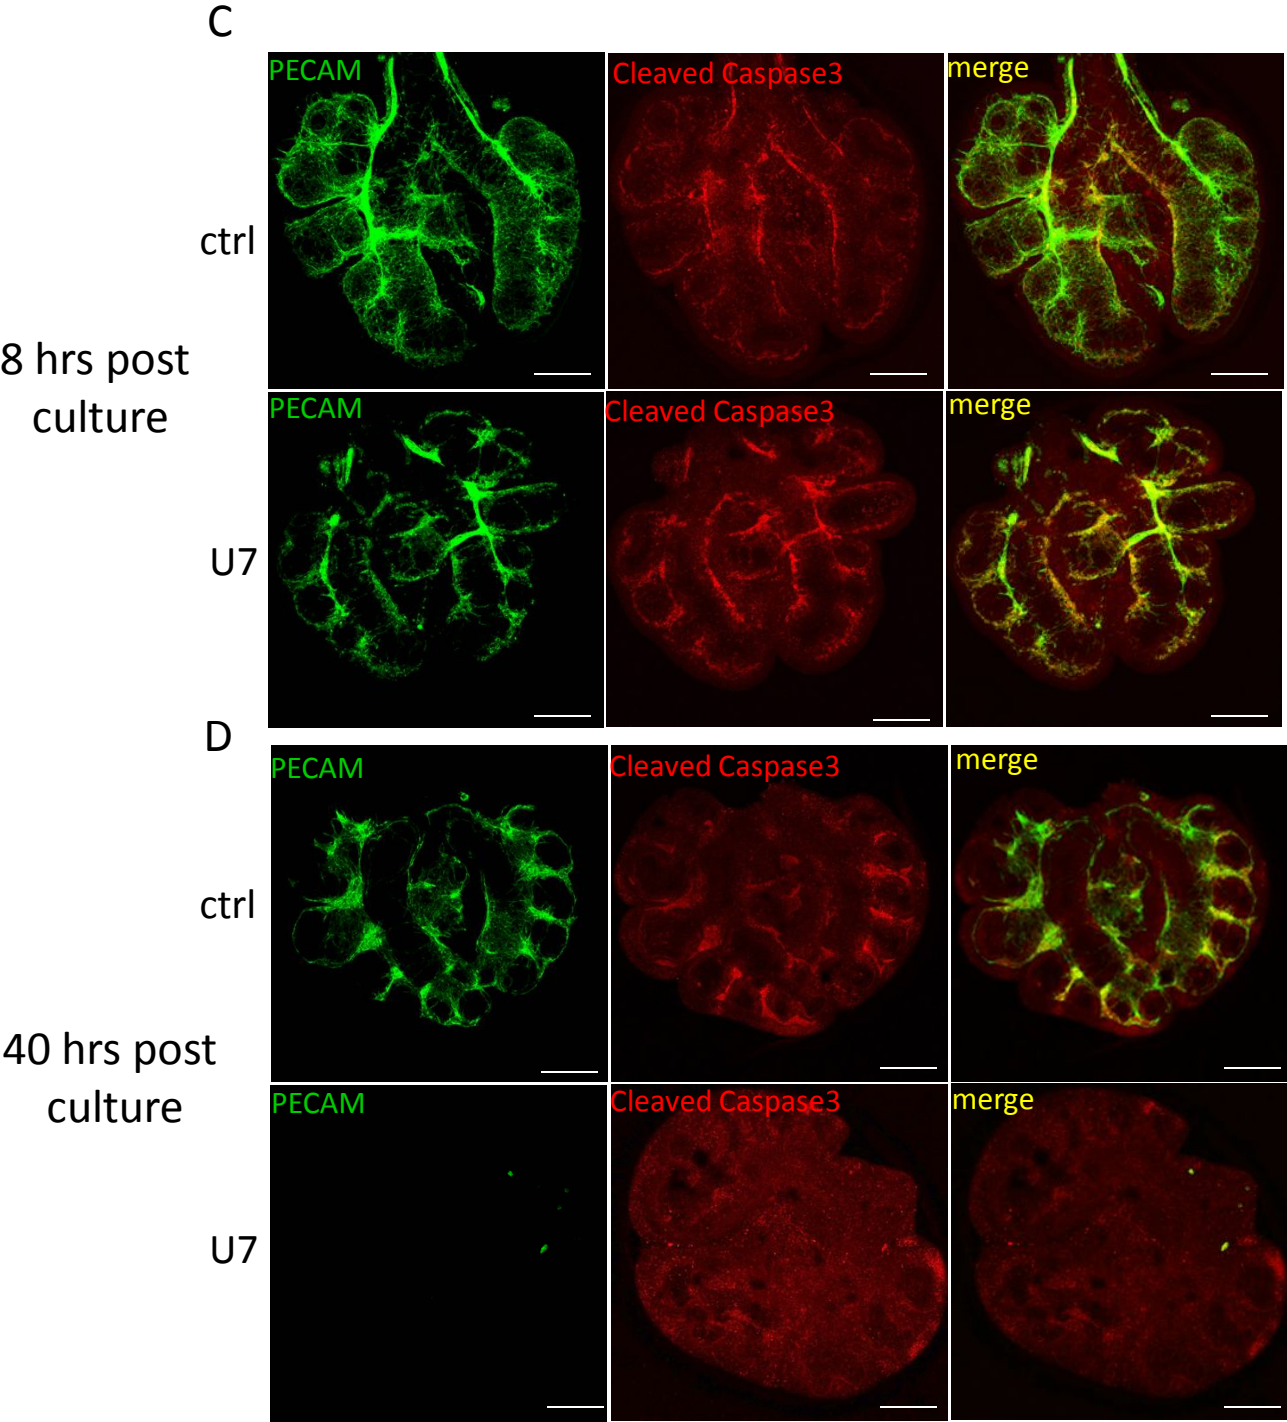

Supplement: dev060723figs10.pdf [file dev060723figs10.pdf]

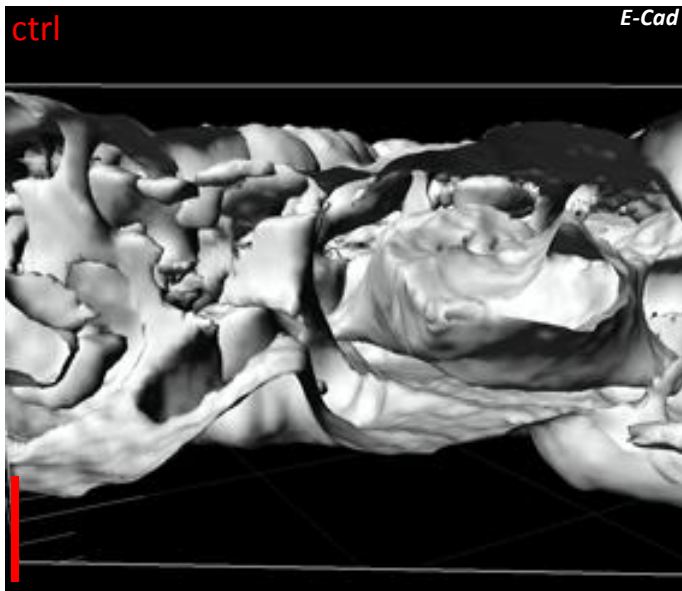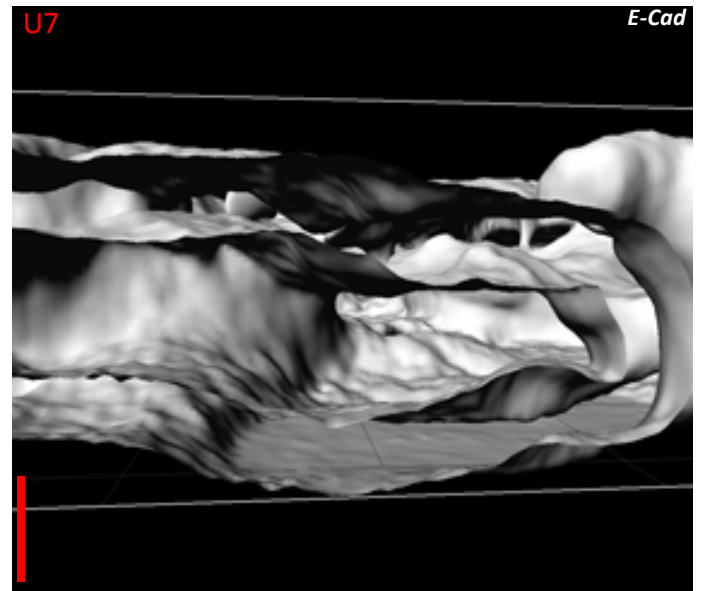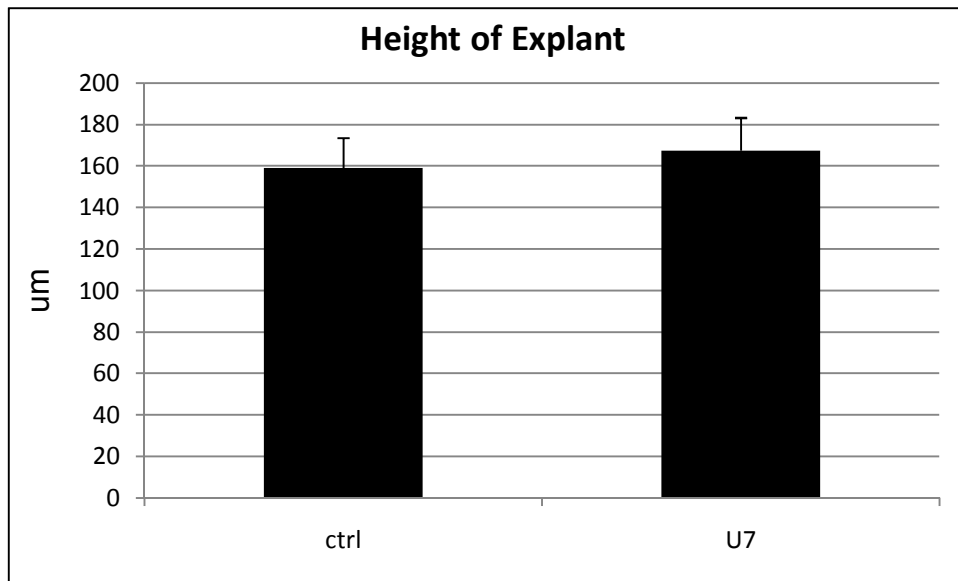

Supplement: dev060723figs11.pdf [file dev060723figs11.pdf]

A

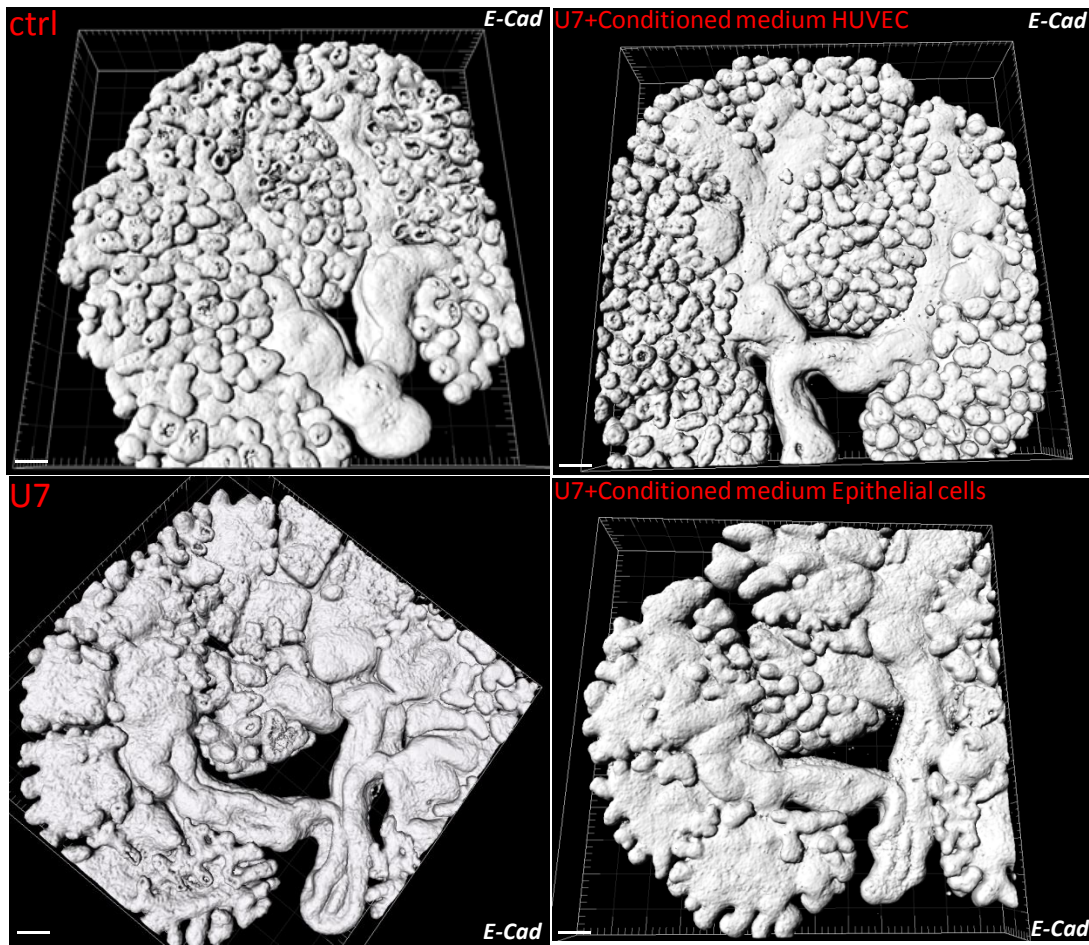

B

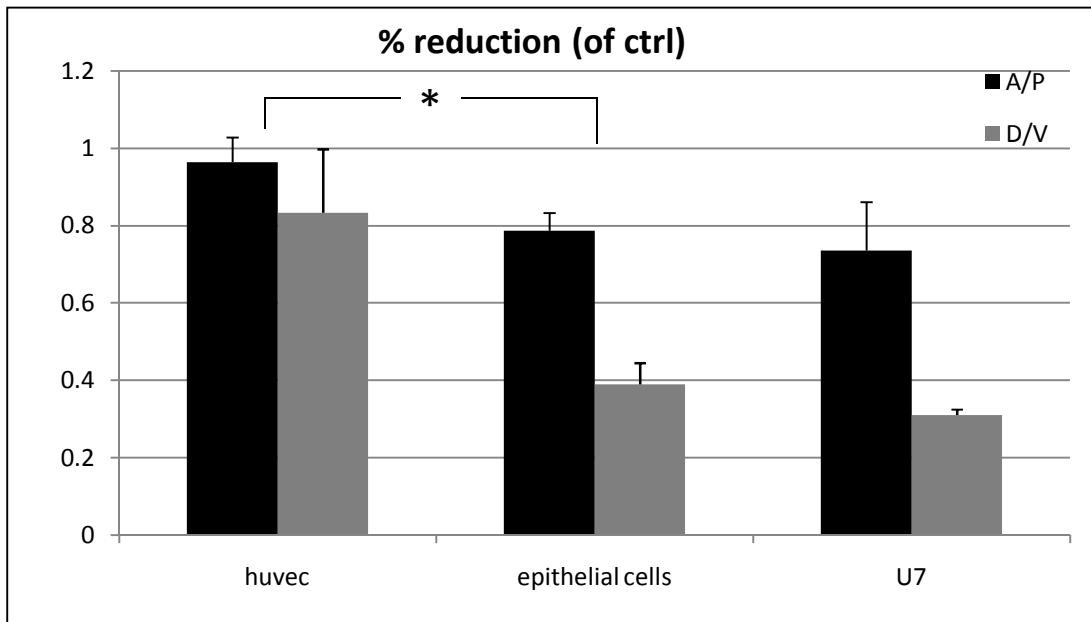

Supplement: dev060723figs12.pdf [file dev060723figs12.pdf]

E12.5

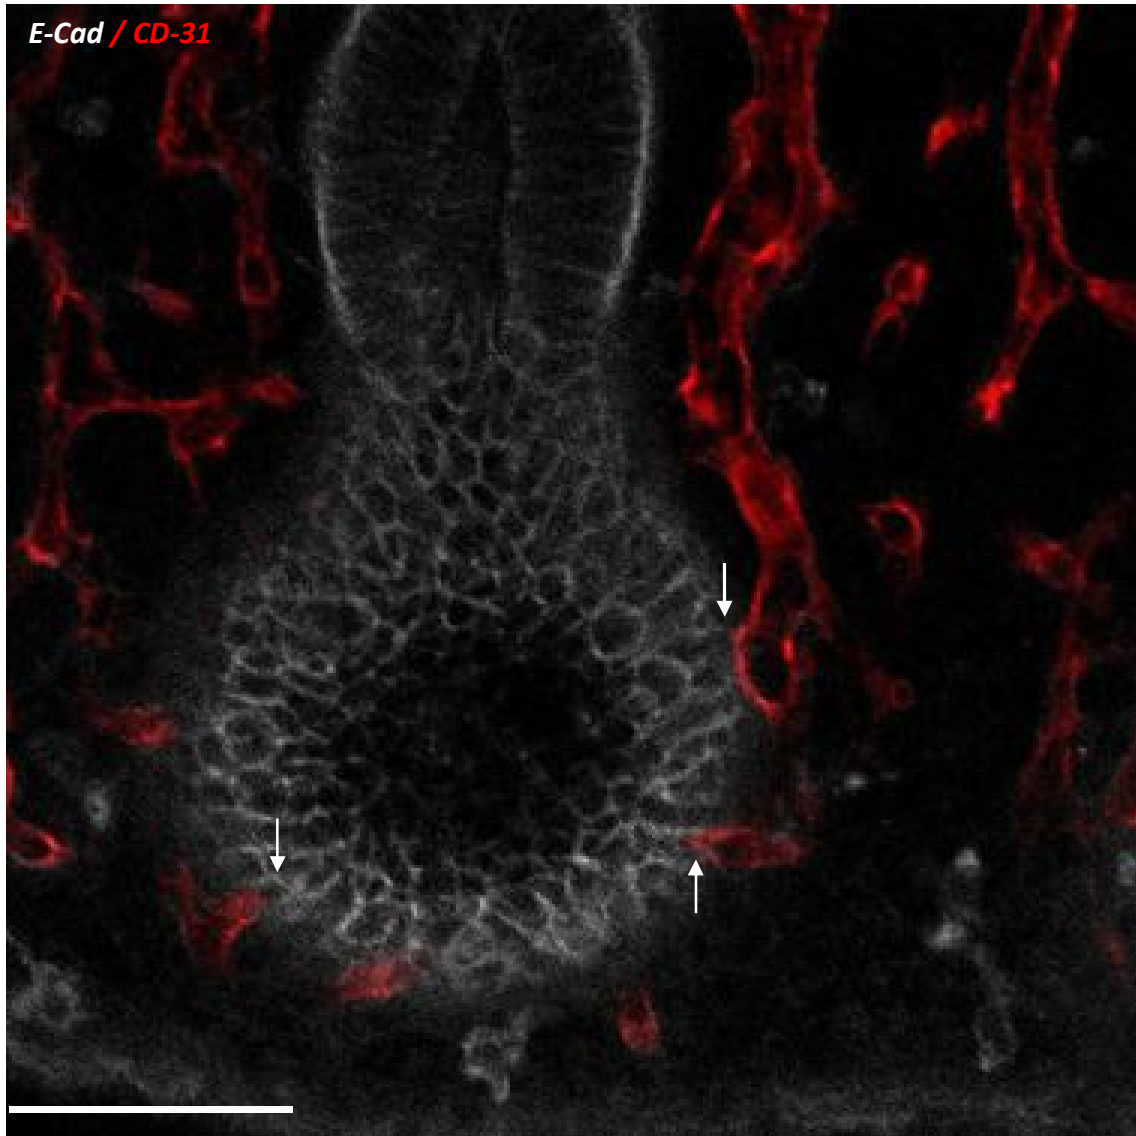

Supplement: dev060723figs13.pdf [file dev060723figs13.pdf]

E12.5

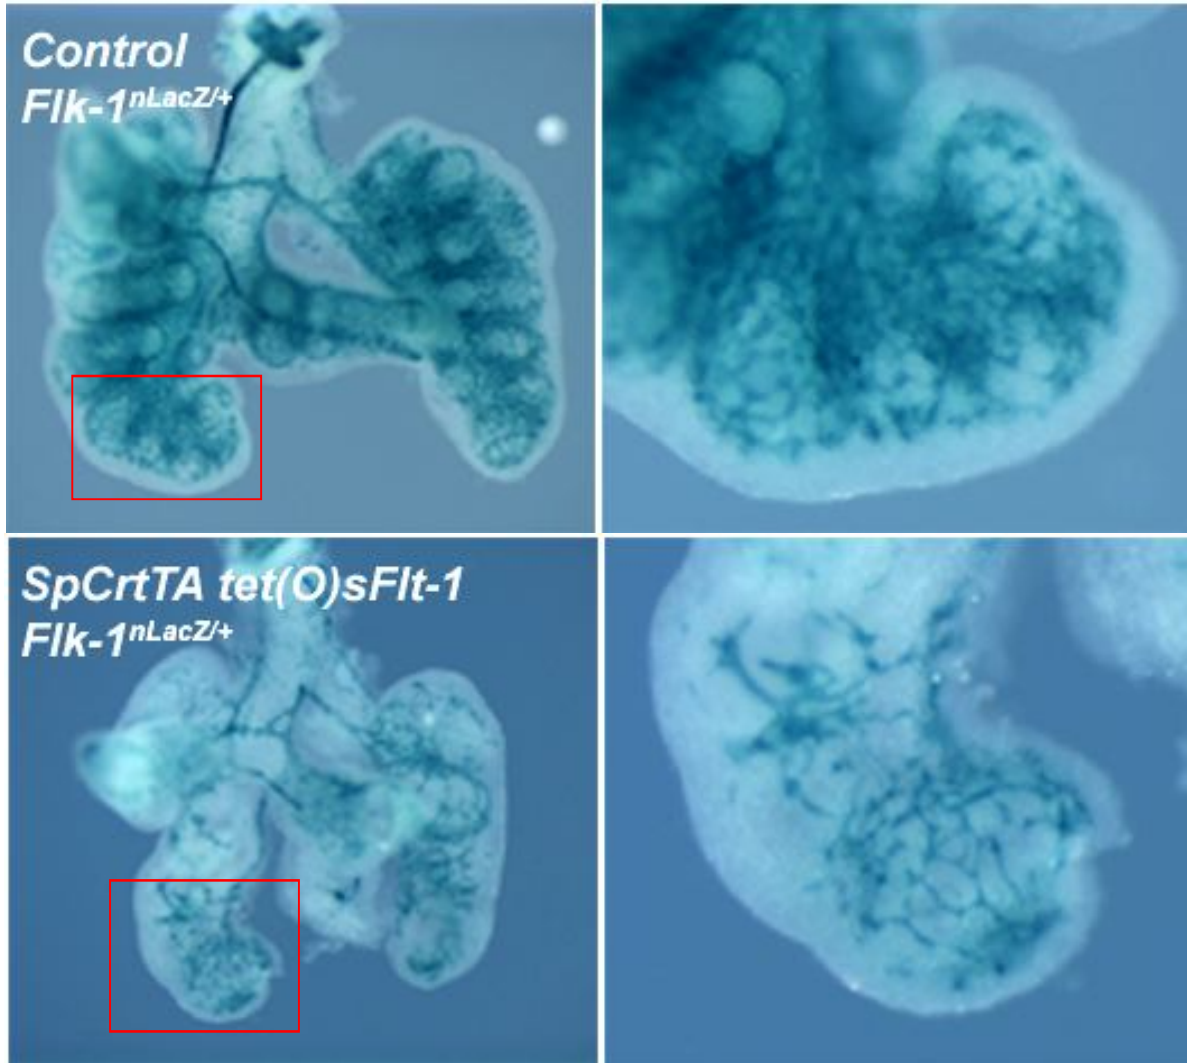

Supplement: dev060723figs2.pdf [file dev060723figs2.pdf]

A

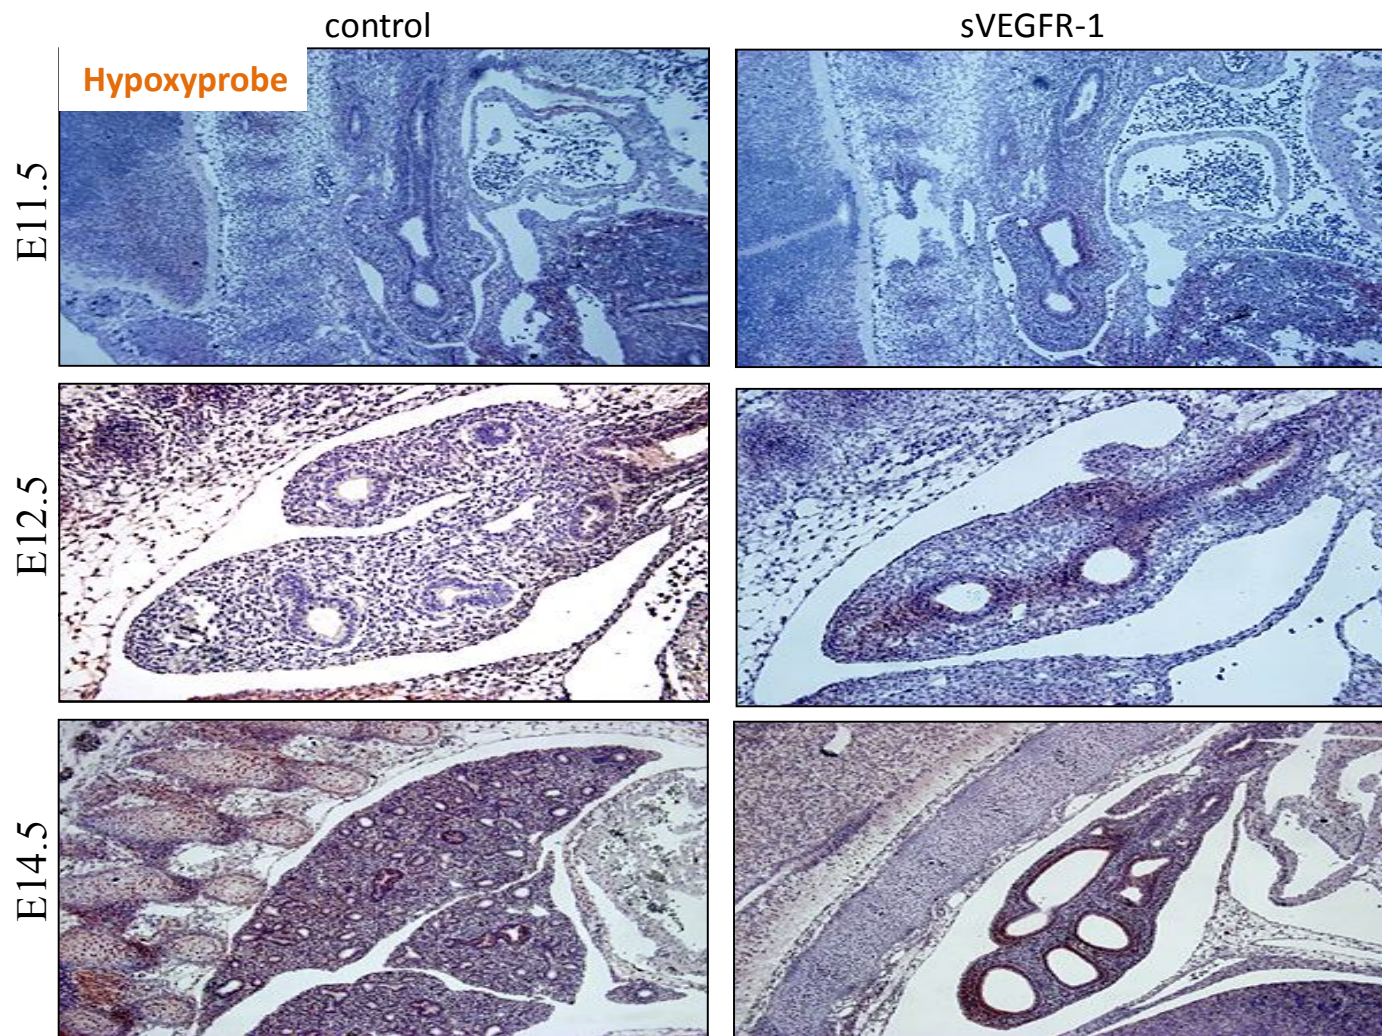

B

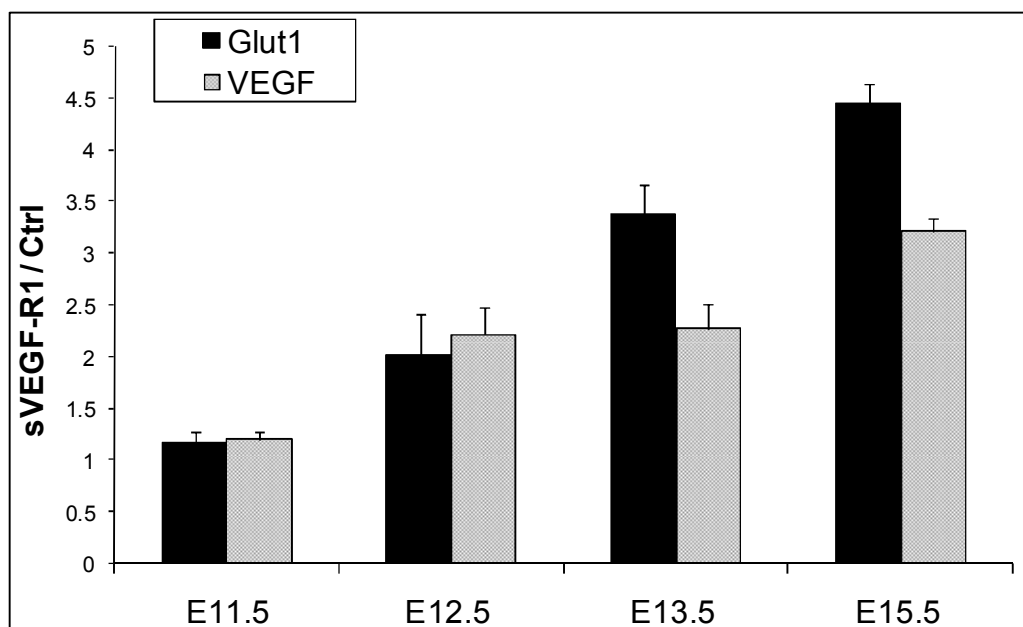

Supplement: dev060723figs3.pdf [file dev060723figs3.pdf]

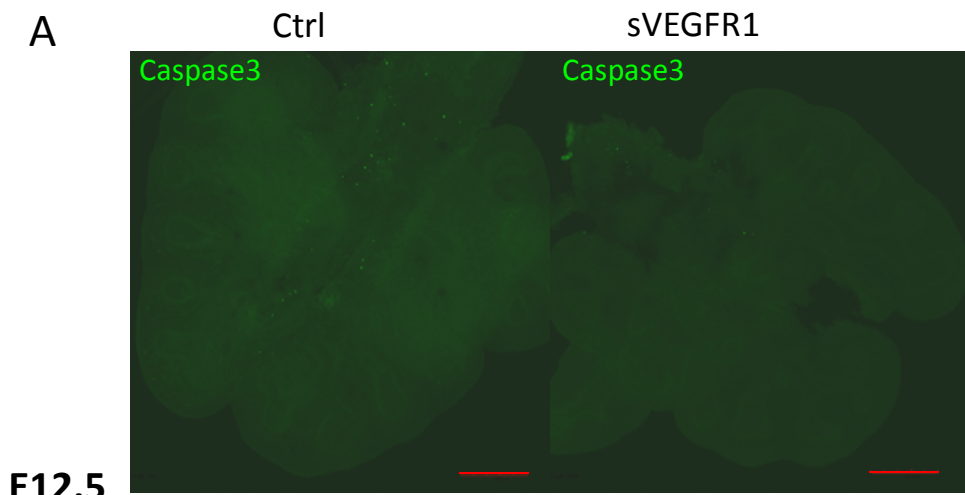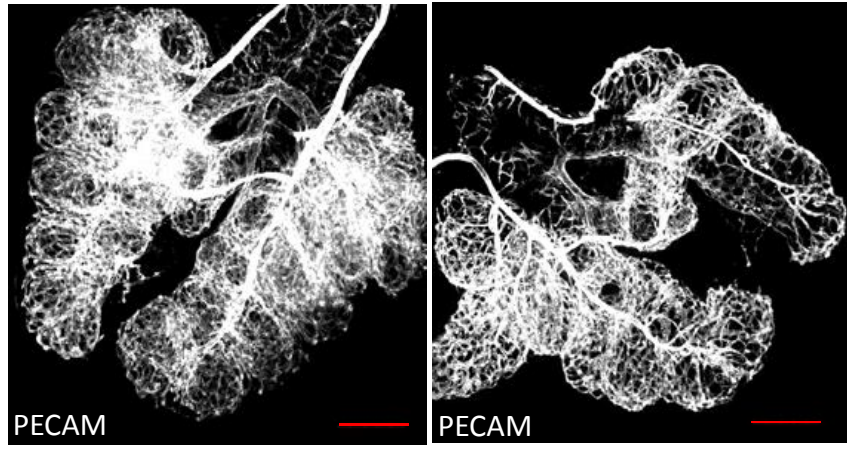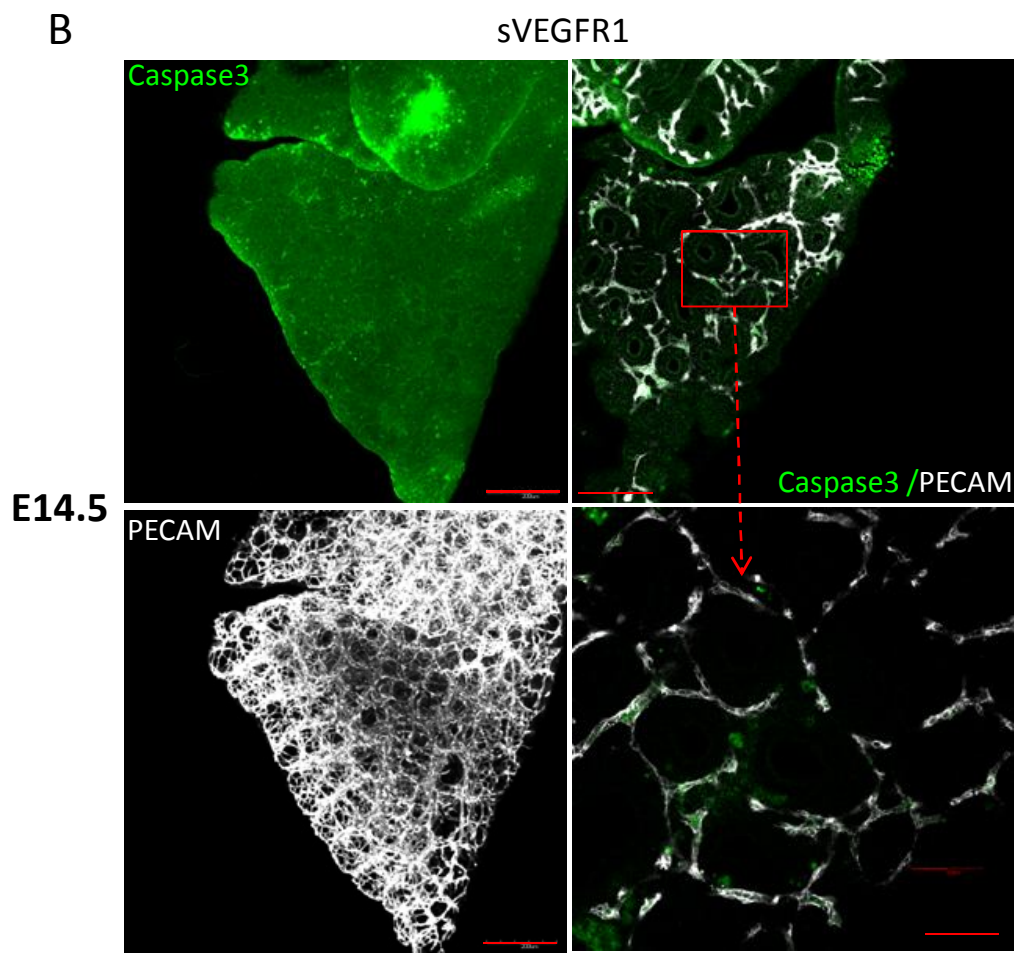

Supplement: dev060723figs4.pdf [file dev060723figs4.pdf]

A

Ctrl

sVEGF-R1

E12.5

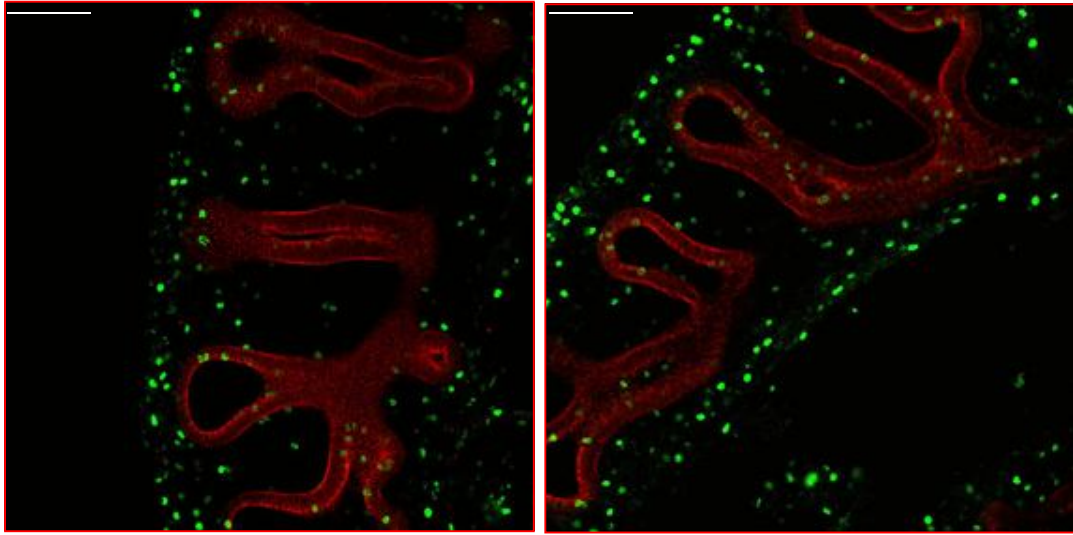

B

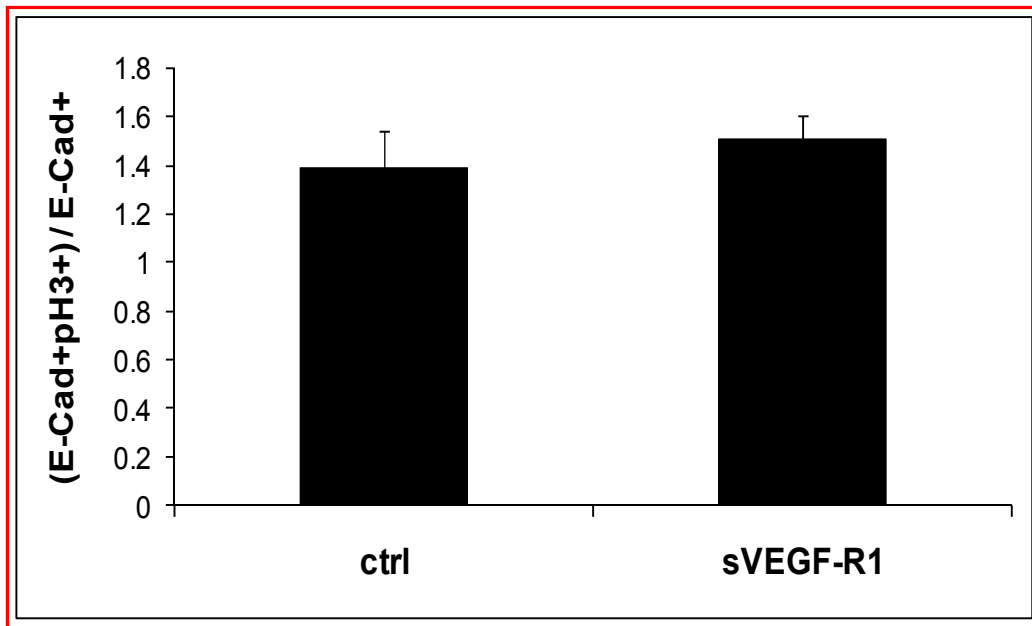

Supplement: dev060723figs5.pdf [file dev060723figs5.pdf]

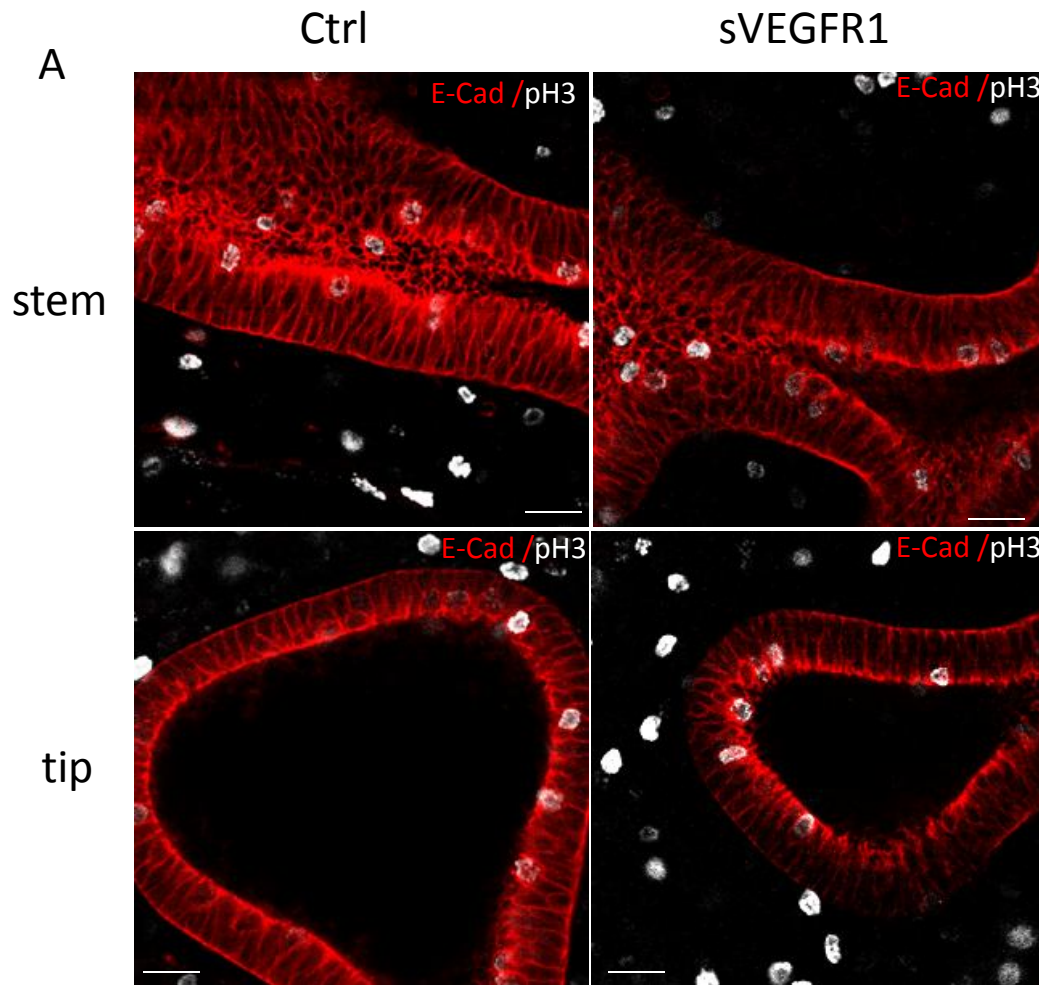

**B**

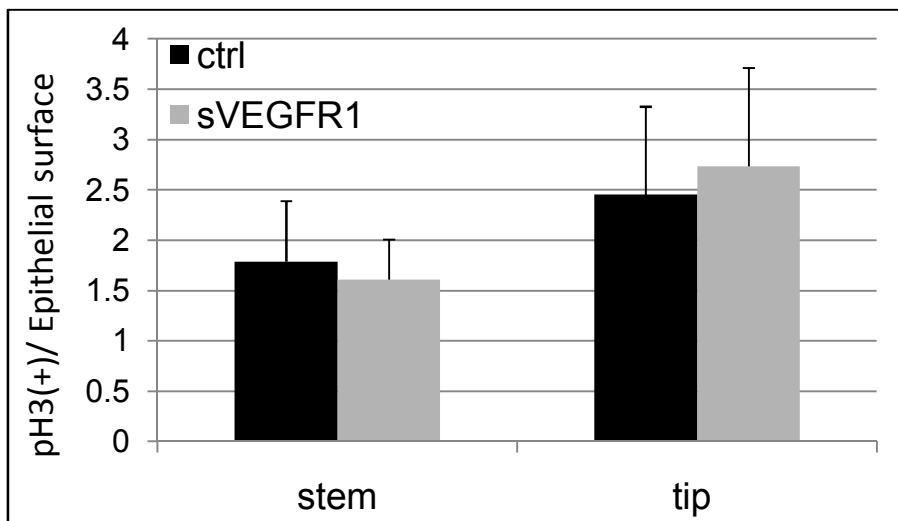

Supplement: dev060723figs6.pdf [file dev060723figs6.pdf]

A

ctrl

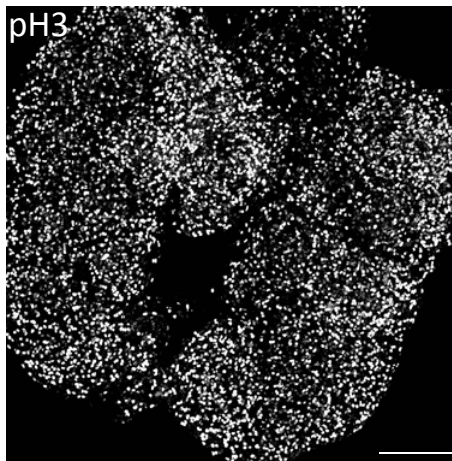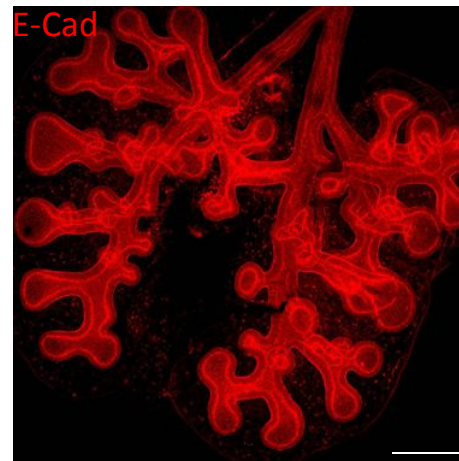

sVEGFR1

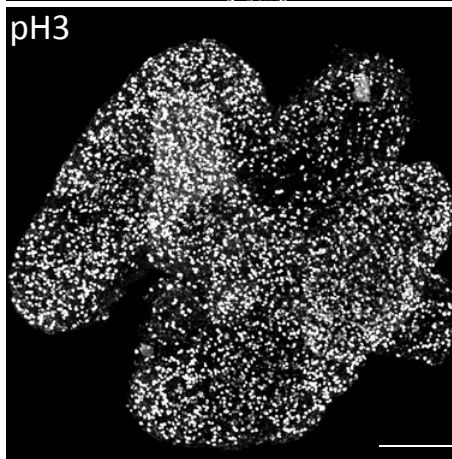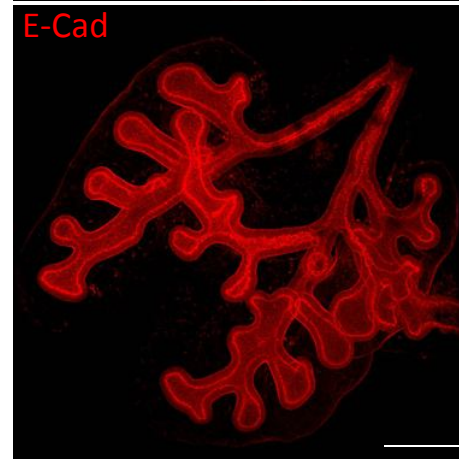

B

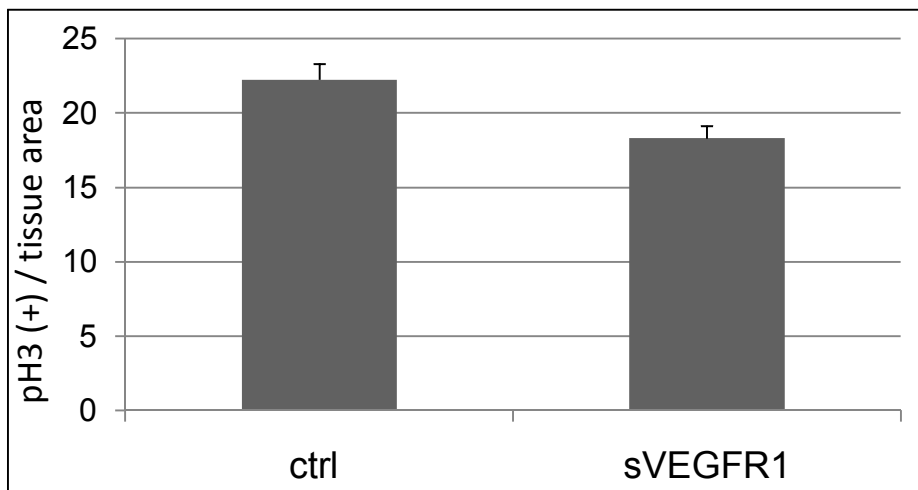

Supplement: dev060723figs7.pdf [file dev060723figs7.pdf]

E12.5

ctrl

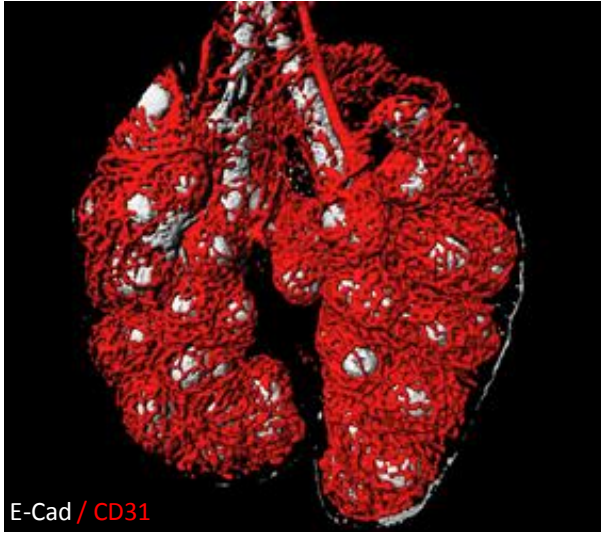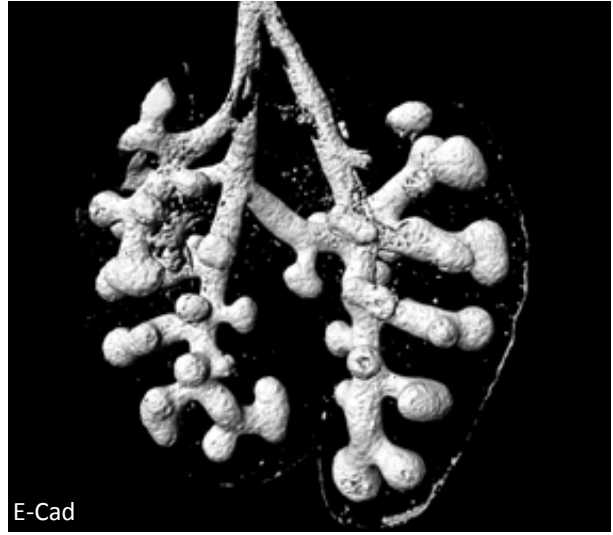

sVEGF-R1

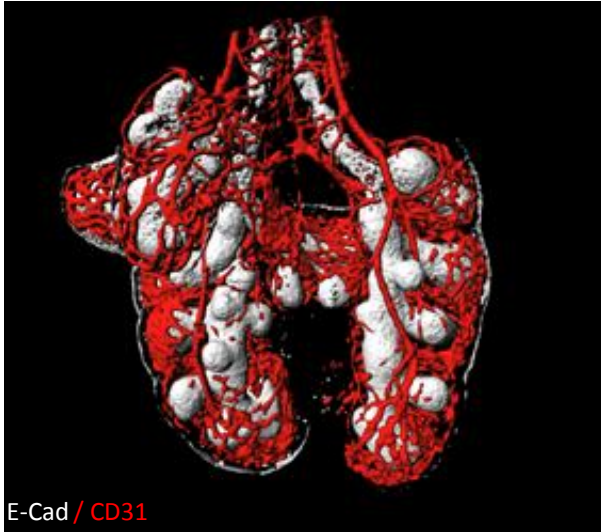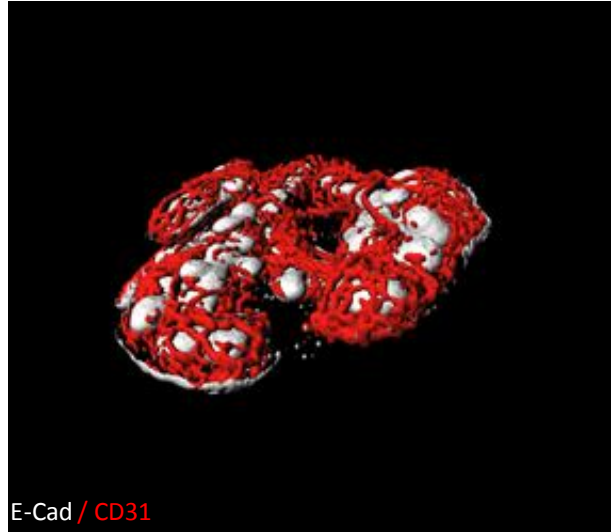

Supplement: dev060723figs8.pdf [file dev060723figs8.pdf]

Control

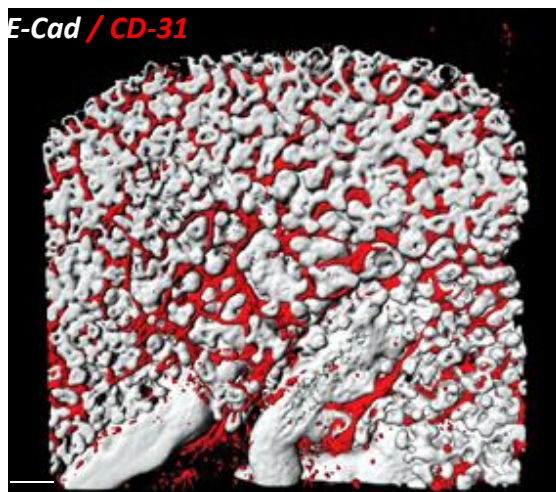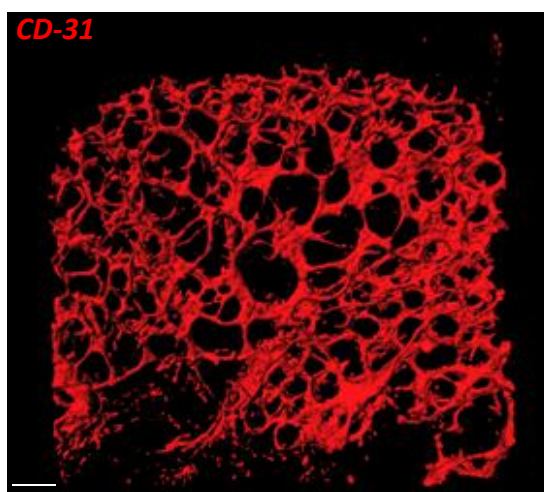

sVEGF-R1  
induced

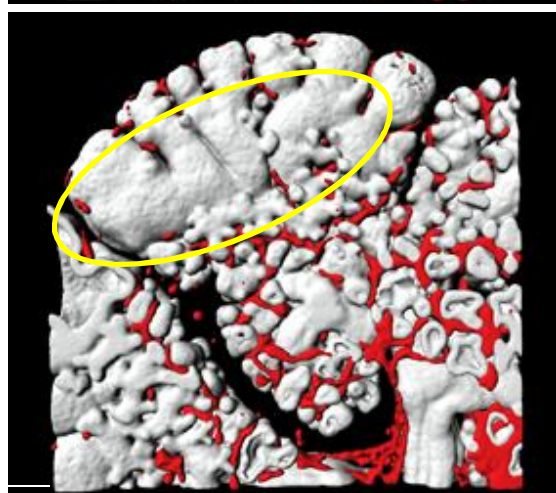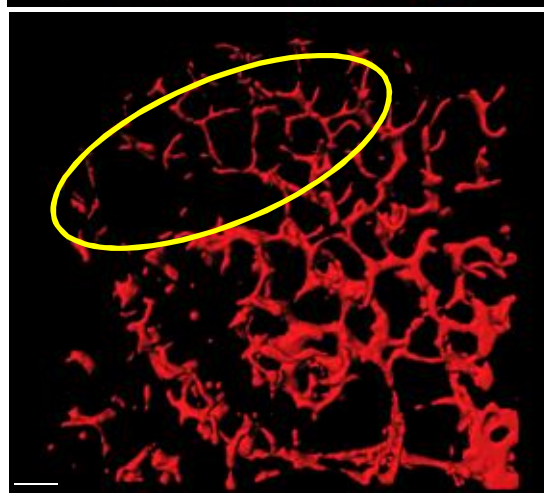

Supplement: dev060723figs9.pdf [file dev060723figs9.pdf]
